# Supplementary material for: Effect of benzo(a)pyrene on oxidative stress and inflammatory mediators in astrocytes and HIV-infected macrophages
Source: PubMed Central journal article supplement (PMC9565757; doi:10.1371/journal.pone.0275874), 2022-10-14

Fig 4B. Original blots

a Control  
b BaP 0.01 $\mu$ M  
c BaP 0.1 $\mu$ M  
d BaP 1 $\mu$ M

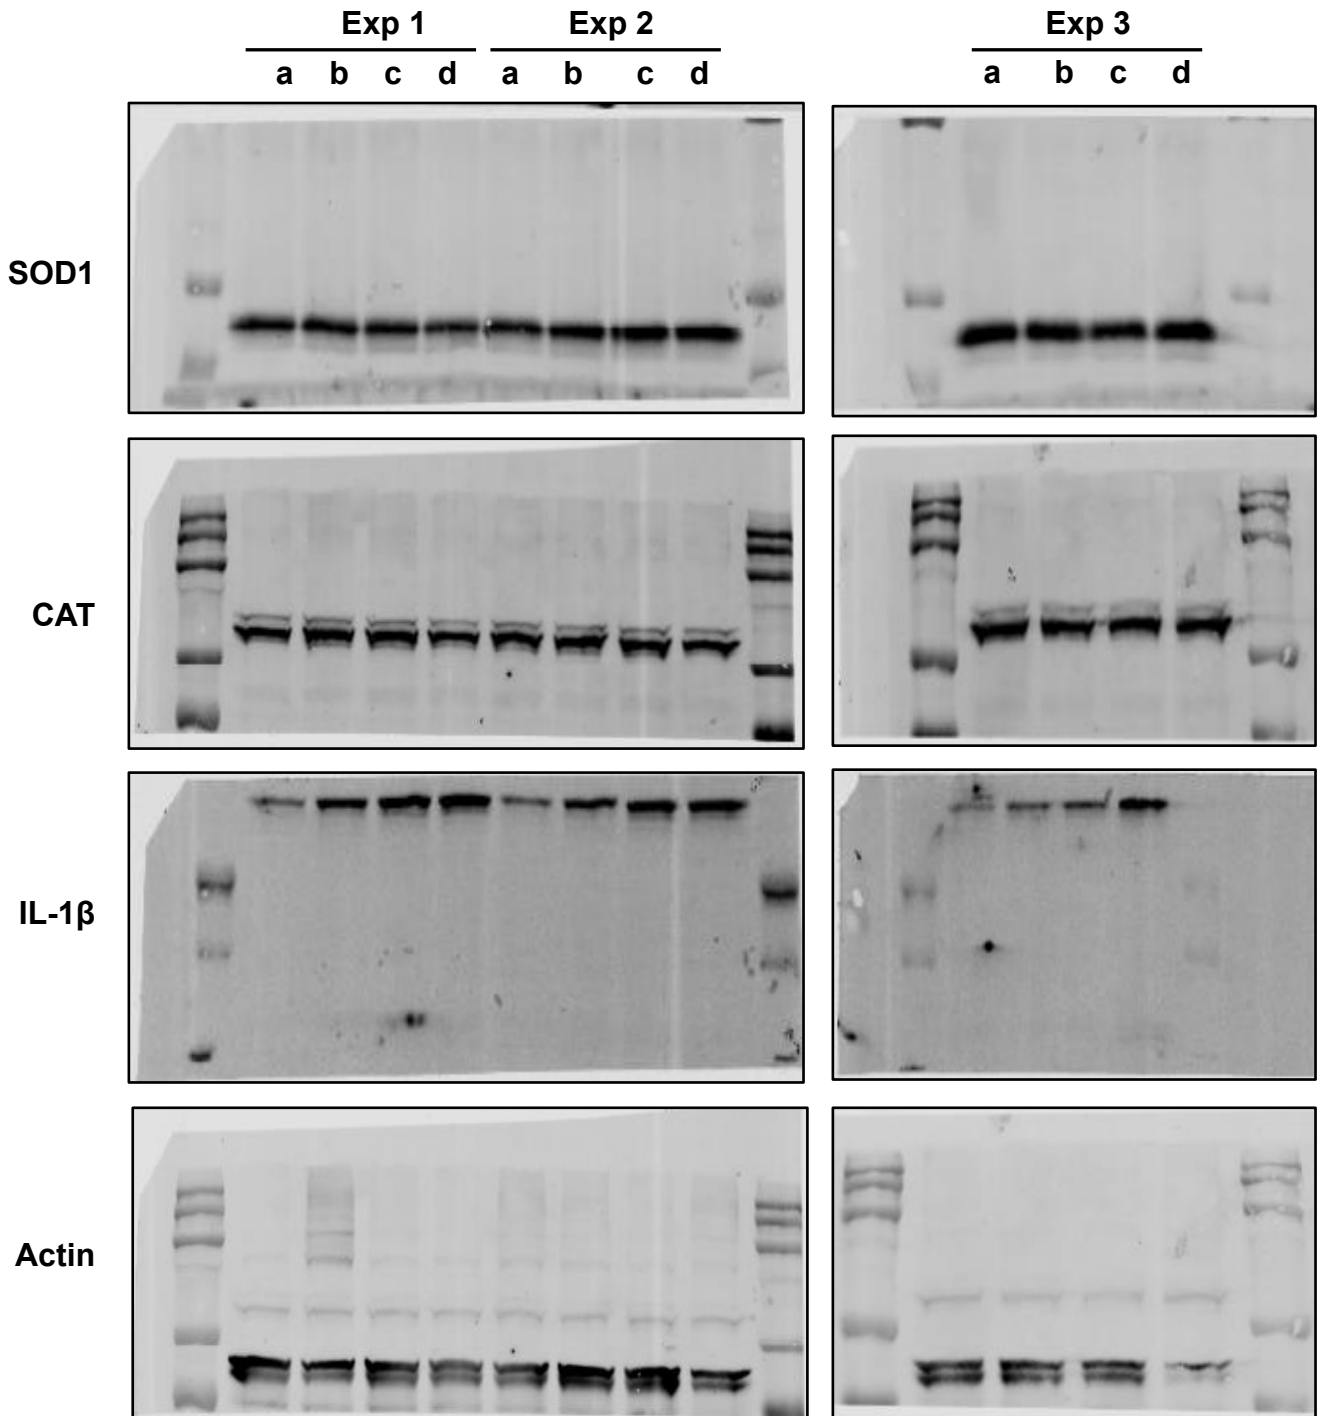

Supplement: pone.0275874.s002.pdf [file pone.0275874.s002.pdf]
